# Supplementary material for: Conformational features of the Aβ42 peptide monomer and its interaction with the surrounding solvent
Source: Royal Society of Chemistry journal article supplement (doi:10.1039/c6cp04925g), 2016-01-01
Supplement: c6cp04925g1.pdf [file c6cp04925g1.pdf]

## **Conformational features of $A\beta_{42}$ peptide monomer and its interaction with surrounding solvent**

Prabir Khatua<sup>a</sup>, Jaya C. Jose<sup>b</sup>, Neelanjana Sengupta<sup>c</sup> and Sanjoy Bandyopadhyay<sup>\*a</sup>

---

<sup>a</sup> *Molecular Modeling Laboratory, Department of Chemistry, Indian Institute of Technology, Kharagpur - 721302, India; E-mail: sanjoy@chem.iitkgp.ernet.in*

<sup>b</sup> *Physical Chemistry Division, CSIR-National Chemical Laboratory, Dr. Homi Bhabha Road, Pune 411008, India*

<sup>c</sup> *Department of Biological Sciences, Indian Institute of Science Education and Research Kolkata, Mohanpur - 741246, West Bangal, India*

**Table SI-1** Simulation cell type, cell dimensions at the beginning and after the equilibration runs, and the number of water molecules for different A $\beta$  peptide monomers

| system | cell type    | initial dimension<br>( $\text{\AA}^3$ ) | dimension after equilibration<br>( $\text{\AA}^3$ ) | no of water<br>molecules |
|--------|--------------|-----------------------------------------|-----------------------------------------------------|--------------------------|
| S1     | cubic        | 80 x 80 x 80                            | 78.47 x 78.47 x 78.47                               | 16098                    |
| S2     | cubic        | 70 x 70 x 70                            | 68.48 x 68.48 x 68.48                               | 10643                    |
| S3     | orthorhombic | 90 x 75 x 75                            | 88.02 x 73.51 x 73.51                               | 15886                    |
| S4     | cubic        | 60 x 60 x 60                            | 58.70 x 58.70 x 58.70                               | 6586                     |
| S5     | cubic        | 64 x 64 x 64                            | 62.65 x 62.65 x 62.65                               | 8075                     |
| S6     | cubic        | 60 x 60 x 60                            | 58.64 x 58.64 x 58.64                               | 6580                     |
| S7     | orthorhombic | 85 x 55 x 60                            | 82.50 x 53.72 x 58.52                               | 8614                     |
| S8     | orthorhombic | 85 x 65 x 65                            | 83.02 x 63.71 x 63.71                               | 11160                    |

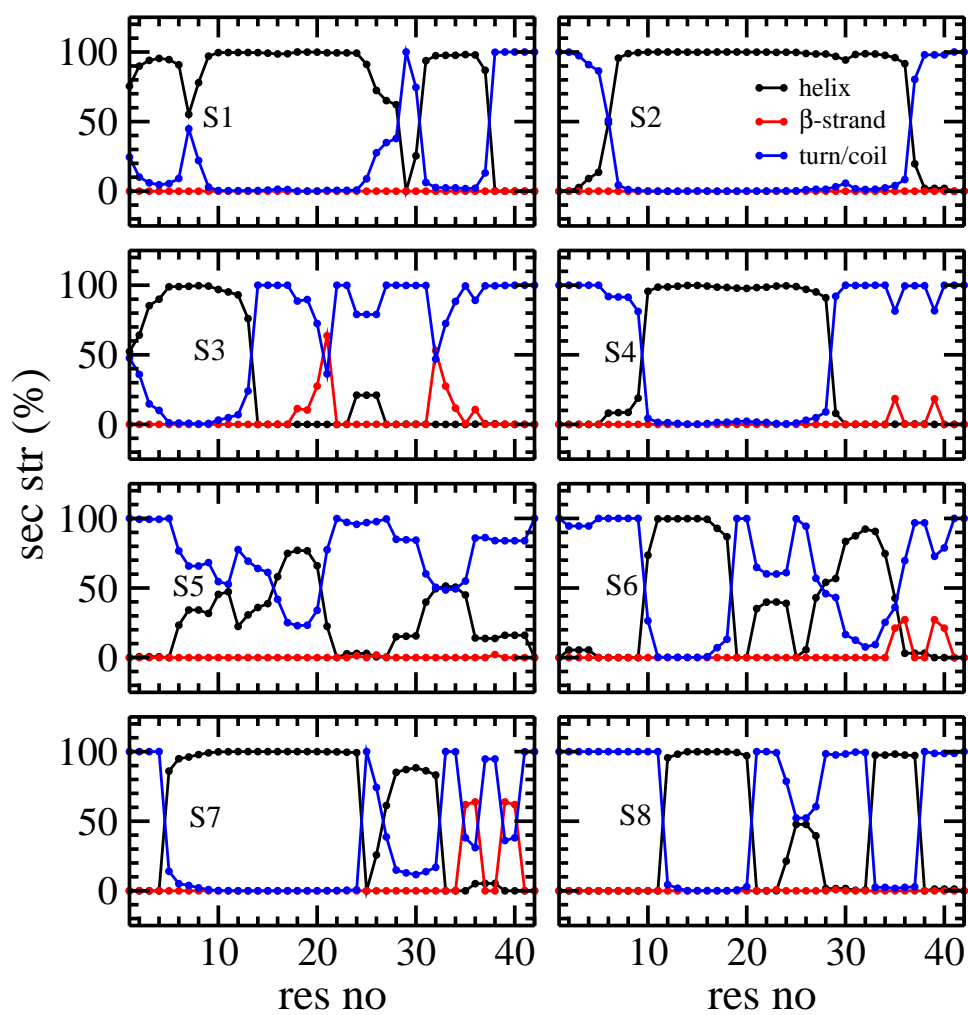

**Fig. SI-1** Residue-wise secondary structural propensity (in %) of the A $\beta$  peptide monomers as obtained from simulations S1 to S8.
